# Supplementary material
Source: PubMed Central journal article supplement (PMC4002130)
Supplement: jm500268j_si_001.pdf [file jm500268j_si_001.pdf]

## Supporting information for

### Triaryl-substituted Schiff Bases are High-Affinity Subtype-Selective Ligands for the Estrogen Receptor

Zong-Quan Liao, Chune Dong, Kathryn E. Carlson, Sathish Srinivasan, Jerome Nwkwuchu, Robert W. Chesnut, Abhishek Sharma, Kendall W. Nettles, John A. Katzenellenbogen,\* and Hai-Bing Zhou\*

#### Table of Contents

|                                                              |              |
|--------------------------------------------------------------|--------------|
| <b>PART I. Table S1: ER RBA Values of compounds 5-9.....</b> | <b>S2</b>    |
| <b>PART II. Analytical techniques.....</b>                   | <b>S3</b>    |
| <b>PART III. Summary of HPLC results.....</b>                | <b>S4</b>    |
| <b>PART IV. HPLC spectra of final compounds.....</b>         | <b>S5-30</b> |

**PART I. Table S1.** Relative Binding Affinities (RBAs)<sup>a</sup> of compounds **5-9** for the estrogen receptor  $\alpha$  and  $\beta$ .

|                                                                                     |             | Compd.                                                                                  | ER $\alpha$                                                                              | ER $\beta$ | $\beta/\alpha$ |     |
|-------------------------------------------------------------------------------------|-------------|-----------------------------------------------------------------------------------------|------------------------------------------------------------------------------------------|------------|----------------|-----|
| 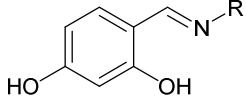   | <b>5a</b>   | R =    | 0.004                                                                                    | 0.181      | 45             |     |
|                                                                                     | <b>5b</b>   | R =   | 0.002                                                                                    | 0.003      | 1.5            |     |
|                                                                                     | <b>5c</b>   | R =    | 0.002                                                                                    | 0.003      | 1.5            |     |
|                                                                                     | <b>5a-h</b> | <b>5d</b>                                                                               | R =     | 0.005      | 0.004          | 0.8 |
|                                                                                     | <b>5e</b>   | R =    | 0.002                                                                                    | <0.001     | --             |     |
|                                                                                     | <b>5f</b>   | R =    | 0.005                                                                                    | 0.008      | 1.6            |     |
|                                                                                     | <b>5g</b>   | R =    | 0.002                                                                                    | 0.017      | 8.5            |     |
|                                                                                     | <b>5h</b>   | R =    | 0.007                                                                                    | 0.013      | 1.9            |     |
|   | <b>6a</b>   | R <sup>1</sup> , R <sup>2</sup> = Me, OH                                                | 0.009                                                                                    | 0.173      | 19             |     |
|                                                                                     | <b>6b</b>   | R <sup>1</sup> , R <sup>2</sup> = Et, OH                                                | 0.013                                                                                    | 0.040      | 3              |     |
|                                                                                     | <b>6c</b>   | R <sup>1</sup> , R <sup>2</sup> = Me, Cl                                                | 0.016                                                                                    | 0.029      | 2              |     |
|  | <b>7</b>    |                                                                                         | 0.018                                                                                    | 0.048      | 2.5            |     |
|                                                                                     | <b>8</b>    |                                                                                         | <0.001                                                                                   | 0.002      | >2             |     |
|  | <b>9a</b>   | R =  | 0.005                                                                                    | 0.016      | 3.2            |     |
|                                                                                     | <b>9b</b>   | R =  | 0.024                                                                                    | 0.186      | 7.8            |     |
|                                                                                     | <b>9a-c</b> | <b>9c</b>                                                                               | R =  | 0.015      | 0.292          | 20  |

<sup>a</sup> See footnote for **Table 1**. Only single affinity measurements were made of these low affinity compounds.

## PART II. Analytical techniques

$^1\text{H}$  NMR and  $^{13}\text{C}$  NMR spectra were recorded on a Bruker AV400 spectrometer (400 MHz,  $^1\text{H}$  NMR; 101 MHz,  $^{13}\text{C}$  NMR) at room temperature. NMR spectra were calibrated to the solvent signals of  $\text{CDCl}_3$  ( $\delta$  7.26 and 77.00), Acetone- $d_6$  ( $\delta$  2.05 and 29.84, 206.26), or DMSO- $d_6$  ( $\delta$  2.50 and 39.43). The chemical shifts are provided in ppm and the coupling constants in Hz. The following abbreviations for multiplicities are used: s, singlet; d, doublet; dd, double doublet; t, triplet; dt, double triplet; q, quadruplet; m, multiplet; br, broad. Chlorobenzene was dried over  $\text{CaH}_2$  and distilled prior to use. Glassware was oven-dried, assembled while hot, and cooled under an inert atmosphere. Unless otherwise noted, all reactions were conducted in an inert atmosphere. Reaction progress was monitored using analytical thin-layer chromatography (TLC). Visualization was achieved by UV light (254 nm). Flash chromatography was performed with silica gel (0.040-0.063 mm) packing. High resolution mass spectra (HRMS) were measured on IonSpec 4.7 Tesla FTMS using MALDI/DHB. Melting points were obtained on X-4 melting point apparatus (Beijing TECH Instruments, Co.,Ltd.) and are uncorrected.

### PART III. Summary of HPLC results

All the HPLC were conducted on SHIMADZU-10A and all the results were obtained under the condition of UV1000-254nm.

| <b>Cmpd</b> | <b>Normal Phase</b> | <b>Ret. Time</b> | <b>%Purity</b> | <b>Reverse Phase</b>                       | <b>Ret. Time</b> | <b>%Purity</b> |
|-------------|---------------------|------------------|----------------|--------------------------------------------|------------------|----------------|
| <b>2a</b>   | 40:60 Hexane: EtOAc | 4.980            | 99.0734        | 40:60 H <sub>2</sub> O: CH <sub>3</sub> CN | 3.743            | 99.3673        |
| <b>2b</b>   | 40:60 Hexane: EtOAc | 4.773            | 100            | 40:60 H <sub>2</sub> O: CH <sub>3</sub> CN | 4.590            | 100            |
| <b>2c</b>   | 40:60 Hexane: EtOAc | 4.630            | 99.5166        | 40:60 H <sub>2</sub> O: CH <sub>3</sub> CN | 4.238            | 99.3923        |
| <b>2d</b>   | 40:60 Hexane: EtOAc | 4.820            | 95.4036        | 40:60 H <sub>2</sub> O: CH <sub>3</sub> CN | 4.128            | 95.6785        |
| <b>2e</b>   | 40:60 Hexane: EtOAc | 4.933            | 97.9549        | 40:60 H <sub>2</sub> O: CH <sub>3</sub> CN | 4.128            | 97.7321        |
| <b>2f</b>   | 40:60 Hexane: EtOAc | 4.892            | 99.3141        | 40:60 H <sub>2</sub> O: CH <sub>3</sub> CN | 4.283            | 99.7822        |
| <b>2g</b>   | 40:60 Hexane: EtOAc | 4.945            | 98.9508        | 40:60 H <sub>2</sub> O: CH <sub>3</sub> CN | 4.614            | 98.6860        |
| <b>2h</b>   | 40:60 Hexane: EtOAc | 4.898            | 98.0660        | 40:60 H <sub>2</sub> O: CH <sub>3</sub> CN | 4.553            | 98.4772        |
| <b>2i</b>   | 40:60 Hexane: EtOAc | 4.760            | 98.9375        | 40:60 H <sub>2</sub> O: CH <sub>3</sub> CN | 4.860            | 99.4761        |
| <b>2j</b>   | 40:60 Hexane: EtOAc | 5.018            | 98.6698        | 40:60 H <sub>2</sub> O: CH <sub>3</sub> CN | 3.838            | 97.1999        |
| <b>2k</b>   | 40:60 Hexane: EtOAc | 4.628            | 98.1290        | 40:60 H <sub>2</sub> O: CH <sub>3</sub> CN | 4.805            | 95.1603        |
| <b>2l</b>   | 40:60 Hexane: EtOAc | 6.660            | 97.5193        | 40:60 H <sub>2</sub> O: CH <sub>3</sub> CN | 3.697            | 97.0678        |
| <b>2n</b>   | 40:60 Hexane: EtOAc | 8.950            | 96.0365        | 40:60 H <sub>2</sub> O: CH <sub>3</sub> CN | 4.525            | 97.1370        |
| <b>4a</b>   | 40:60 Hexane: EtOAc | 4.842            | 100            | 40:60 H <sub>2</sub> O: CH <sub>3</sub> CN | 3.665            | 100            |
| <b>4b</b>   | 40:60 Hexane: EtOAc | 4.873            | 100            | 40:60 H <sub>2</sub> O: CH <sub>3</sub> CN | 4.368            | 99.5620        |
| <b>4c</b>   | 40:60 Hexane: EtOAc | 4.972            | 99.3654        | 40:60 H <sub>2</sub> O: CH <sub>3</sub> CN | 4.262            | 99.3437        |
| <b>4d</b>   | 40:60 Hexane: EtOAc | 5.460            | 99.6515        | 40:60 H <sub>2</sub> O: CH <sub>3</sub> CN | 4.368            | 99.2738        |
| <b>4e</b>   | 40:60 Hexane: EtOAc | 7.080            | 98.5416        | 40:60 H <sub>2</sub> O: CH <sub>3</sub> CN | 4.332            | 98.8311        |
| <b>4f</b>   | 40:60 Hexane: EtOAc | 5.140            | 100            | 40:60 H <sub>2</sub> O: CH <sub>3</sub> CN | 4.515            | 99.7220        |
| <b>4g</b>   | 40:60 Hexane: EtOAc | 5.132            | 97.0697        | 40:60 H <sub>2</sub> O: CH <sub>3</sub> CN | 4.843            | 98.7303        |
| <b>4h</b>   | 40:60 Hexane: EtOAc | 4.992            | 96.2784        | 40:60 H <sub>2</sub> O: CH <sub>3</sub> CN | 4.863            | 99.5213        |
| <b>4i</b>   | 40:60 Hexane: EtOAc | 5.310            | 97.8483        | 40:60 H <sub>2</sub> O: CH <sub>3</sub> CN | 4.768            | 98.2337        |
| <b>4j</b>   | 40:60 Hexane: EtOAc | 4.462            | 99.5828        | 40:60 H <sub>2</sub> O: CH <sub>3</sub> CN | 4.062            | 99.1691        |
| <b>4k</b>   | 40:60 Hexane: EtOAc | 3.748            | 97.1470        | 40:60 H <sub>2</sub> O: CH <sub>3</sub> CN | 5.127            | 99.2799        |
| <b>4l</b>   | 40:60 Hexane: EtOAc | 4.717            | 97.4688        | 40:60 H <sub>2</sub> O: CH <sub>3</sub> CN | 4.007            | 97.4333        |
| <b>4n</b>   | 40:60 Hexane: EtOAc | 9.630            | 97.8223        | 40:60 H <sub>2</sub> O: CH <sub>3</sub> CN | 5.147            | 97.2463        |

## PART IV. HPLC spectra of final compounds

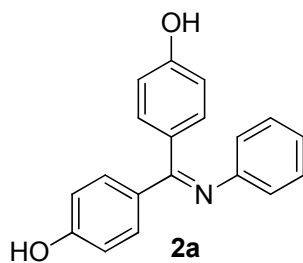

Normal Phase (Method 40:60 Hexane: EtOAc, Flow rate 0.7mL/min)

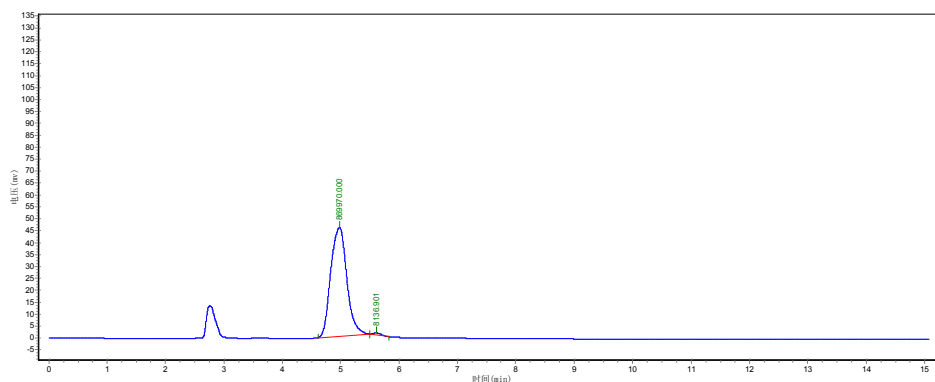

| No. | Retention time | Peak height | Peak area  | Percent |
|-----|----------------|-------------|------------|---------|
| 1   | 4.980          | 45565.527   | 869970.000 | 99.0734 |
| 2   | 5.610          | 831.822     | 8136.901   | 0.9266  |

total 100

Reverse Phase (Method 40:60 H<sub>2</sub>O:CH<sub>3</sub>CN, Flow rate 0.7mL/min)

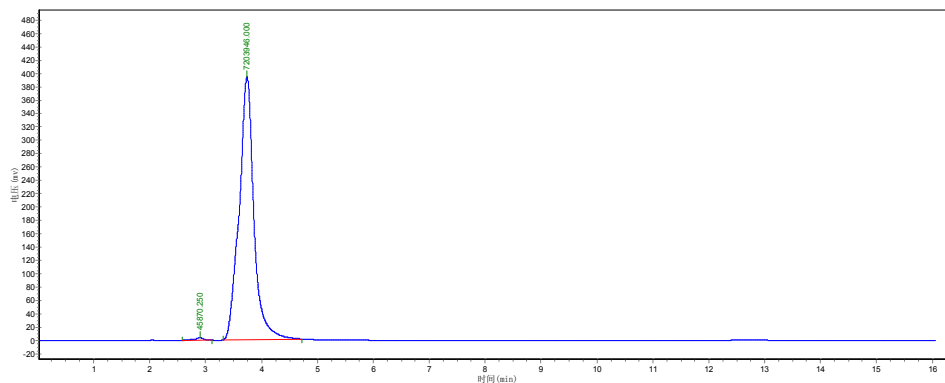

| No. | Retention time | Peak height | Peak area   | Percent |
|-----|----------------|-------------|-------------|---------|
| 1   | 2.897          | 3703.155    | 45870.250   | 0.6327  |
| 2   | 3.743          | 393839.656  | 7203946.000 | 99.3673 |

total 100

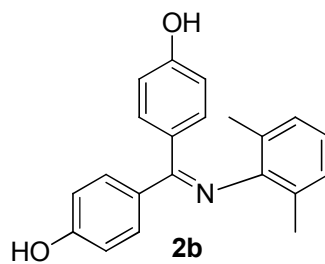

Normal Phase (Method 40:60 Hexane: EtOAc, Flow rate 0.7mL/min)

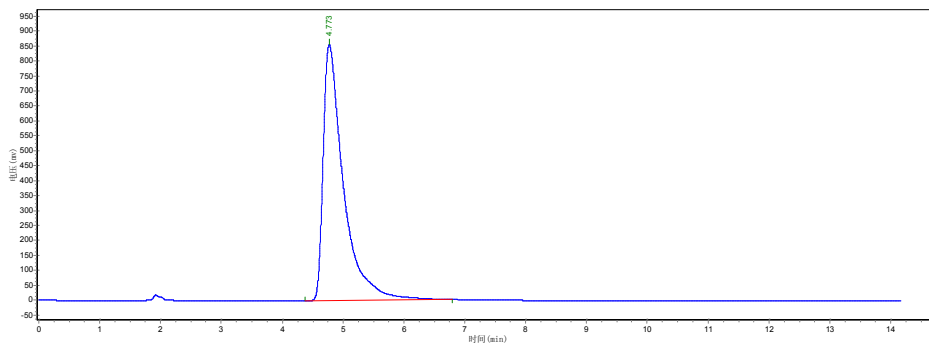

| No. | Retention time | Peak height | Peak area    | Percent  |
|-----|----------------|-------------|--------------|----------|
| 1   | 4.773          | 856766.000  | 19856186.000 | 100.0000 |

total 100

Reverse Phase (Method 40:60 H<sub>2</sub>O:CH<sub>3</sub>CN, Flow rate 0.7mL/min)

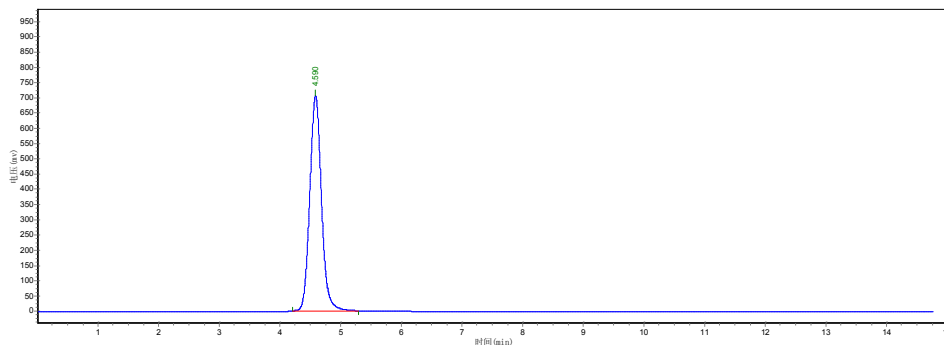

| No. | Retention time | Peak height | Peak area   | Percent  |
|-----|----------------|-------------|-------------|----------|
| 1   | 4.590          | 704877.938  | 9437654.000 | 100.0000 |

total 100

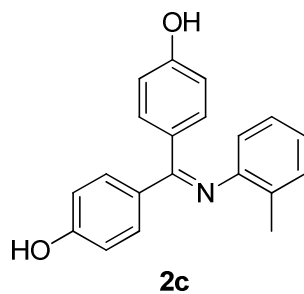

Normal Phase (Method 40:60 Hexane: EtOAc, Flow rate 0.7mL/min)

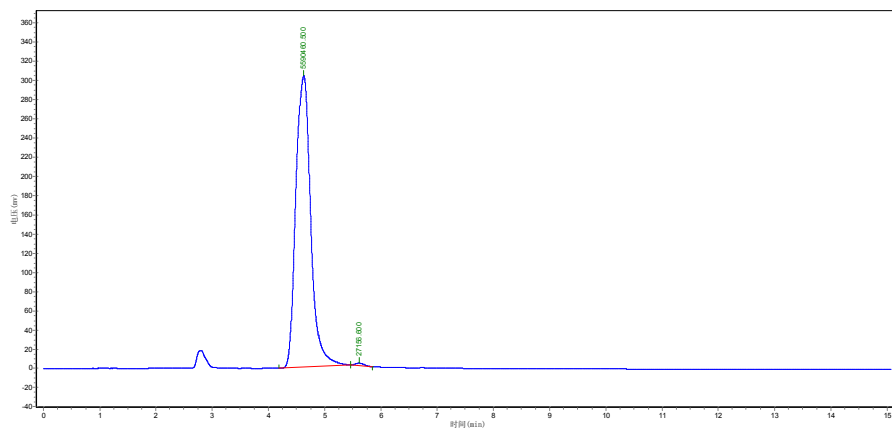

| No. | Retention time | Peak height | Peak area   | Percent |
|-----|----------------|-------------|-------------|---------|
| 1   | 4.630          | 303418.531  | 5590460.500 | 99.5166 |
| 2   | 5.407          | 2611.669    | 27156.600   | 0.4834  |

total 100

Reverse Phase (Method 40:60 H<sub>2</sub>O:CH<sub>3</sub>CN, Flow rate 0.7mL/min)

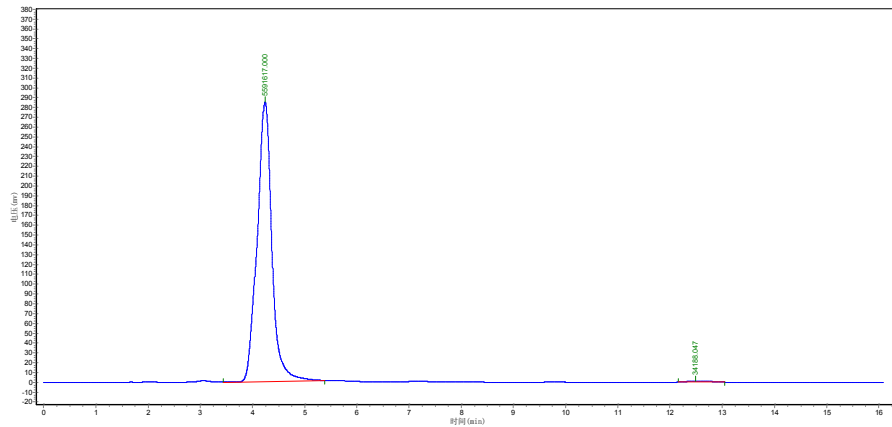

| No. | Retention time | Peak height | Peak area   | Percent |
|-----|----------------|-------------|-------------|---------|
| 1   | 4.238          | 284735.750  | 5591617.000 | 99.3923 |
| 2   | 12.483         | 1164.254    | 34188.047   | 0.6077  |

total 100

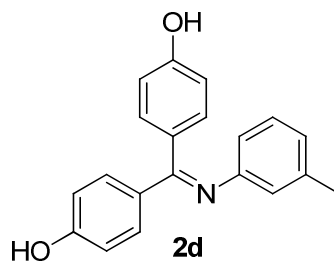

Normal Phase (Method 40:60 Hexane: EtOAc, Flow rate 0.7mL/min)

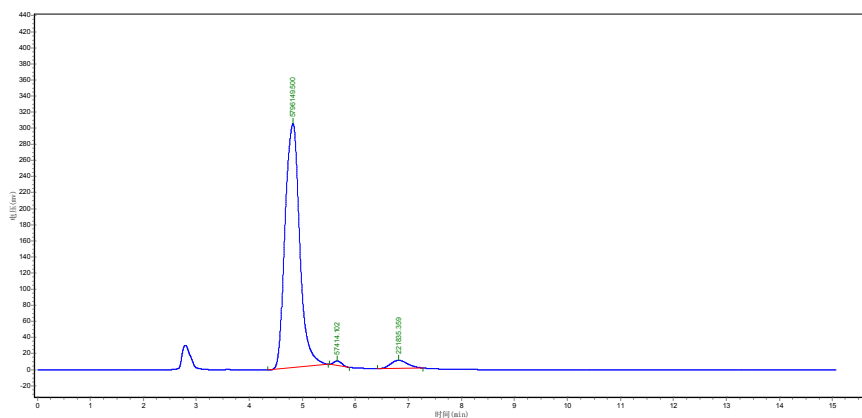

| No. | Retention time | Peak height | Peak area   | Percent |
|-----|----------------|-------------|-------------|---------|
| 1   | 4.820          | 303074.375  | 5796149.500 | 95.4036 |
| 2   | 5.655          | 5487.177    | 57414.102   | 0.9450  |
| 3   | 6.822          | 9957.286    | 221835.359  | 3.6514  |

---

total 100

Reverse Phase (Method 40:60 H<sub>2</sub>O:CH<sub>3</sub>CN, Flow rate 0.7mL/min)

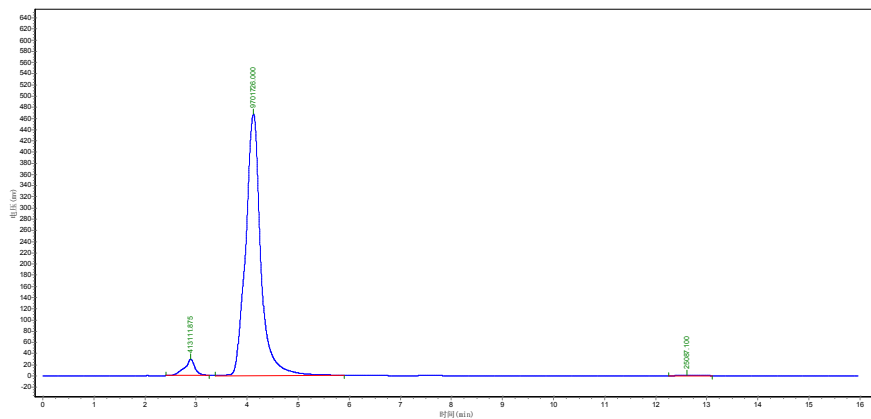

| No. | Retention time | Peak height | Peak area   | Percent |
|-----|----------------|-------------|-------------|---------|
| 1   | 2.895          | 29605.164   | 413111.875  | 4.0741  |
| 2   | 4.128          | 467146.188  | 9701726.000 | 95.6785 |
| 3   | 12.612         | 940.070     | 25087.100   | 0.2474  |



total

100

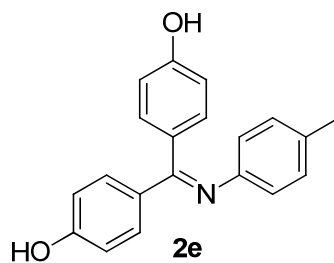

Normal Phase (Method 40:60 Hexane: EtOAc, Flow rate 0.7mL/min)

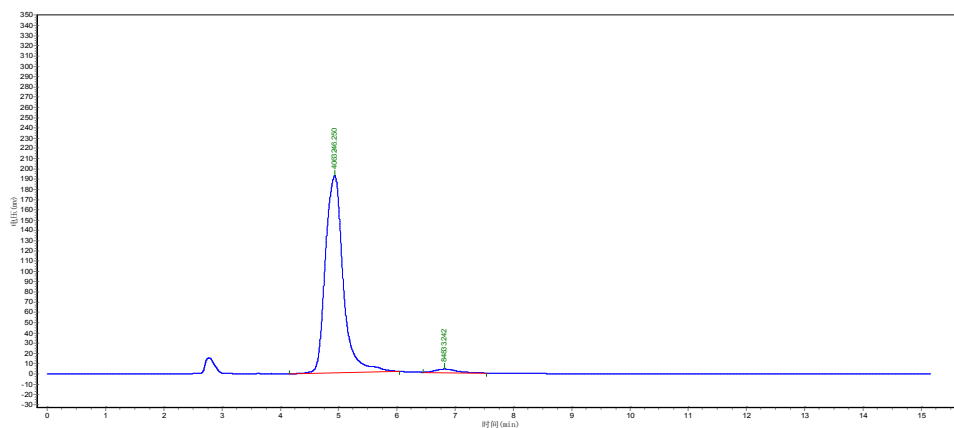

| No. | Retention time | Peak height | Peak area   | Percent |
|-----|----------------|-------------|-------------|---------|
| 1   | 4.933          | 192296.313  | 4063246.250 | 97.9549 |
| 2   | 6.815          | 3464.734    | 84833.242   | 2.0451  |

total

100

Reverse Phase (Method 40:60 H<sub>2</sub>O:CH<sub>3</sub>CN, Flow rate 0.7mL/min)

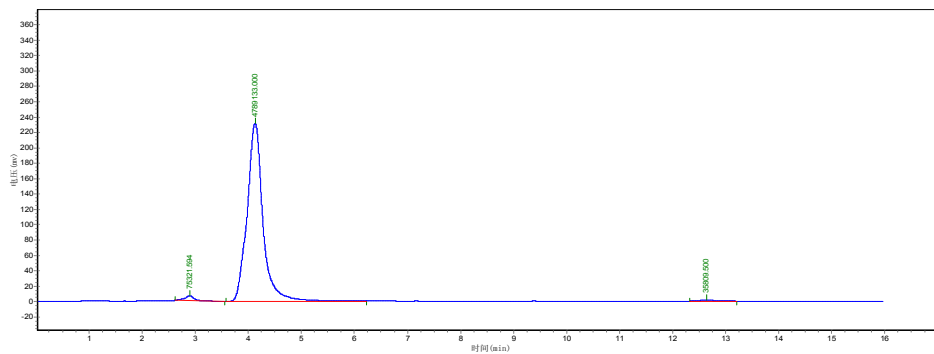

| No. | Retention time | Peak height | Peak area   | Percent |
|-----|----------------|-------------|-------------|---------|
| 1   | 2.893          | 6382.281    | 75321.594   | 1.5371  |
| 2   | 4.128          | 231311.297  | 4789133.000 | 97.7321 |
| 3   | 12.640         | 1236.823    | 35809.500   | 0.7308  |

total

100

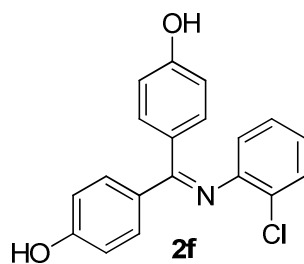

Normal Phase (Method 40:60 Hexane: EtOAc, Flow rate 0.7mL/min)

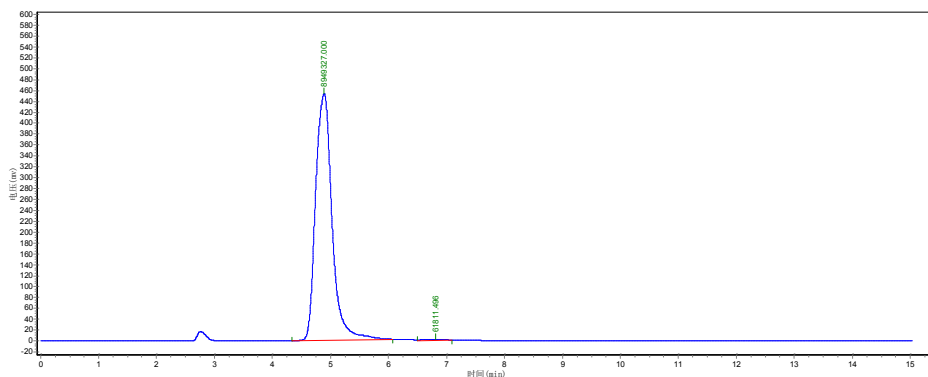

| No. | Retention time | Peak height | Peak area   | Percent |
|-----|----------------|-------------|-------------|---------|
| 1   | 4.892          | 452863.688  | 8949327.000 | 99.3141 |
| 2   | 6.815          | 2329.834    | 61811.496   | 0.6859  |

total 100

Reverse Phase (Method 40:60 H<sub>2</sub>O:CH<sub>3</sub>CN, Flow rate 0.7mL/min)

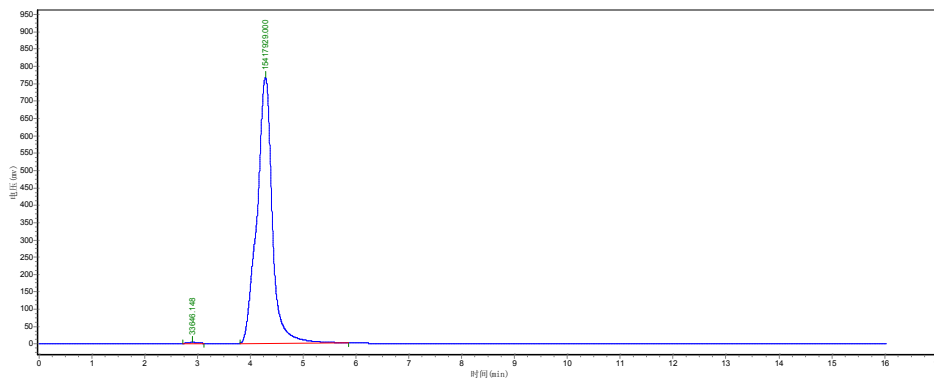

| No. | Retention time | Peak height | Peak area    | Percent |
|-----|----------------|-------------|--------------|---------|
| 1   | 2.903          | 3217.693    | 33646.148    | 0.2178  |
| 2   | 4.283          | 766449.188  | 15417929.000 | 99.7822 |

total 100

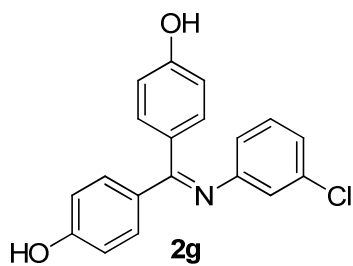

Normal Phase (Method 40:60 Hexane: EtOAc, Flow rate 0.7mL/min)

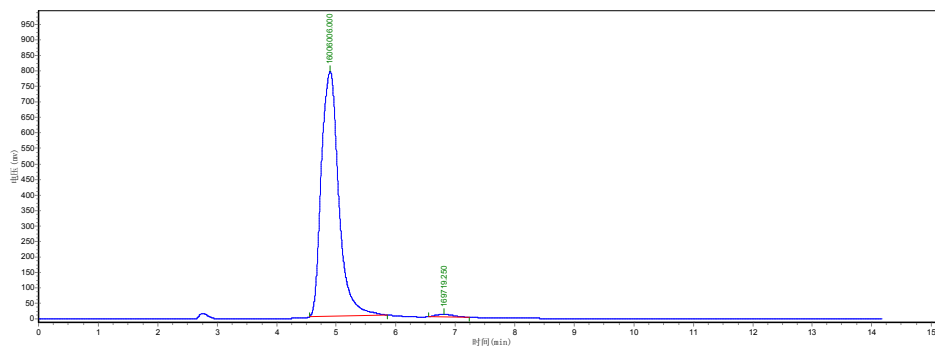

| No. | Retention time | Peak height | Peak area    | Percent |
|-----|----------------|-------------|--------------|---------|
| 1   | 4.945          | 790553.813  | 16006006.000 | 98.9508 |
| 2   | 6.902          | 8259.269    | 169719.250   | 1.0492  |

total 100

Reverse Phase (Method 40:60 H<sub>2</sub>O:CH<sub>3</sub>CN, Flow rate 0.7mL/min)

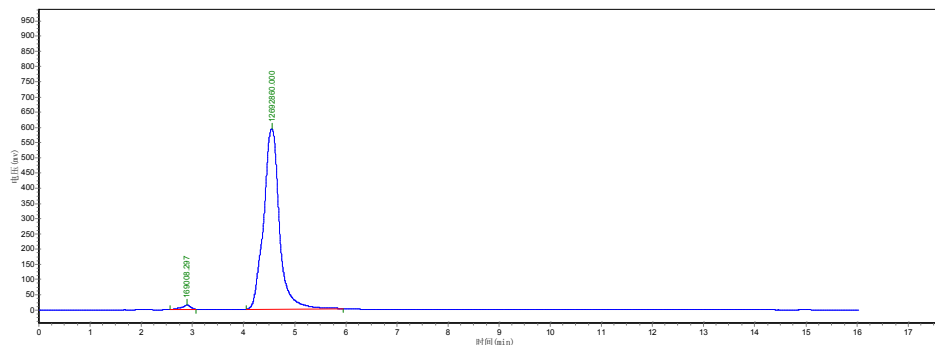

| No. | Retention time | Peak height | Peak area    | Percent |
|-----|----------------|-------------|--------------|---------|
| 1   | 2.923          | 13925.279   | 169008.297   | 1.3140  |
| 2   | 4.614          | 592433.125  | 12692860.000 | 98.6860 |

total 100

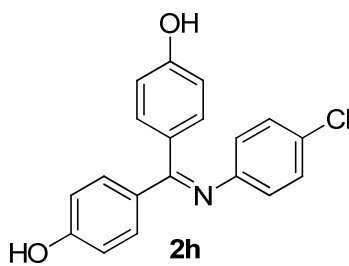

Normal Phase (Method 40:60 Hexane: EtOAc, Flow rate 0.7mL/min)

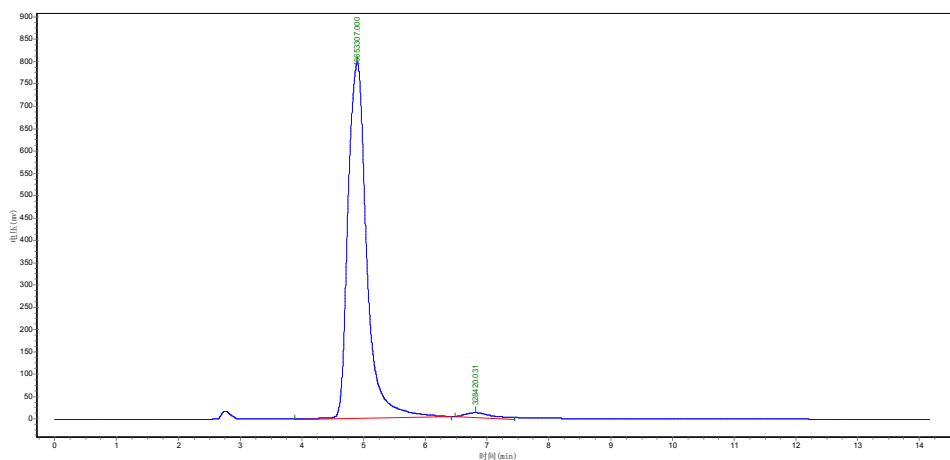

| No. | Retention time | Peak height | Peak area    | Percent |
|-----|----------------|-------------|--------------|---------|
| 1   | 4.898          | 796373.438  | 16653307.000 | 98.0660 |
| 2   | 6.810          | 10742.045   | 328420.031   | 1.9340  |

total 100

Reverse Phase (Method 40:60 H<sub>2</sub>O:CH<sub>3</sub>CN, Flow rate 0.7mL/min)

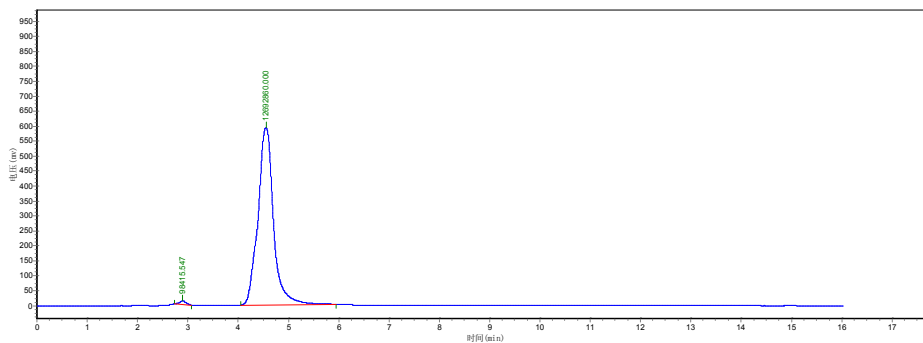

| No. | Retention time | Peak height | Peak area    | Percent |
|-----|----------------|-------------|--------------|---------|
| 1   | 2.895          | 14950.634   | 198718.000   | 1.5228  |
| 2   | 4.553          | 593562.750  | 12851158.000 | 98.4772 |

total 100

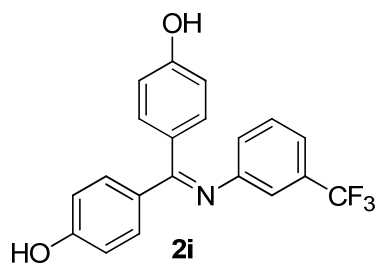

Normal Phase (Method 40:60 Hexane: EtOAc, Flow rate 0.7mL/min)

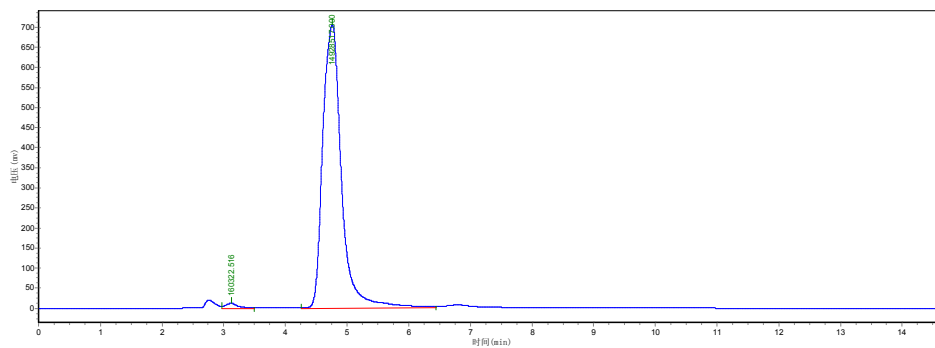

| No. | Retention time | Peak height | Peak area    | Percent |
|-----|----------------|-------------|--------------|---------|
| 1   | 3.120          | 11588.420   | 160322.516   | 1.0625  |
| 2   | 4.760          | 706350.875  | 14928517.000 | 98.9375 |

total 100

Reverse Phase (Method 40:60 H<sub>2</sub>O:CH<sub>3</sub>CN, Flow rate 0.7mL/min)

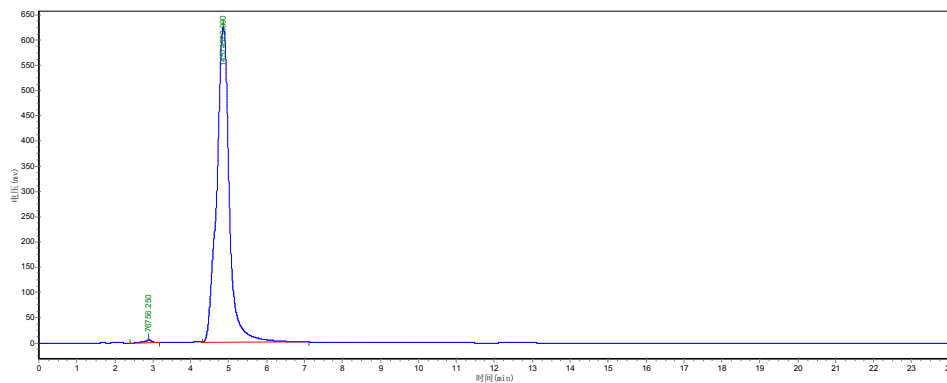

| No. | Retention time | Peak height | Peak area    | Percent |
|-----|----------------|-------------|--------------|---------|
| 1   | 2.893          | 5679.271    | 76756.250    | 0.5239  |
| 2   | 4.860          | 625021.063  | 14574579.000 | 99.4761 |

total 100

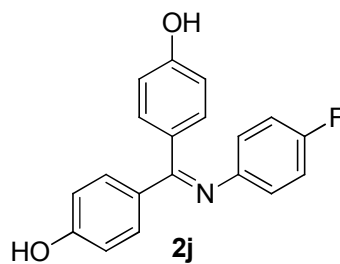

Normal Phase (Method 40:60 Hexane: EtOAc, Flow rate 0.7mL/min)

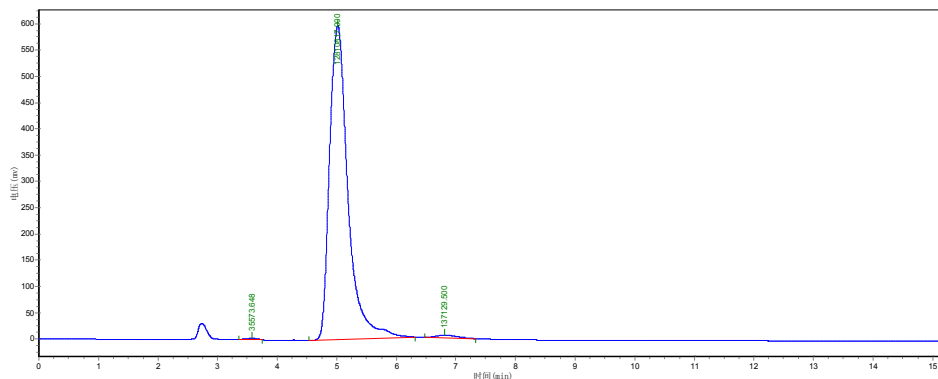

| No. | Retention time | Peak height | Peak area    | Percent |
|-----|----------------|-------------|--------------|---------|
| 1   | 3.578          | 2537.218    | 35573.648    | 0.2740  |
| 2   | 5.018          | 597045.750  | 12810817.000 | 98.6698 |
| 3   | 6.813          | 5749.064    | 137129.500   | 1.0562  |

total 100

Reverse Phase (Method 40:60 H<sub>2</sub>O:CH<sub>3</sub>CN, Flow rate 0.7mL/min)

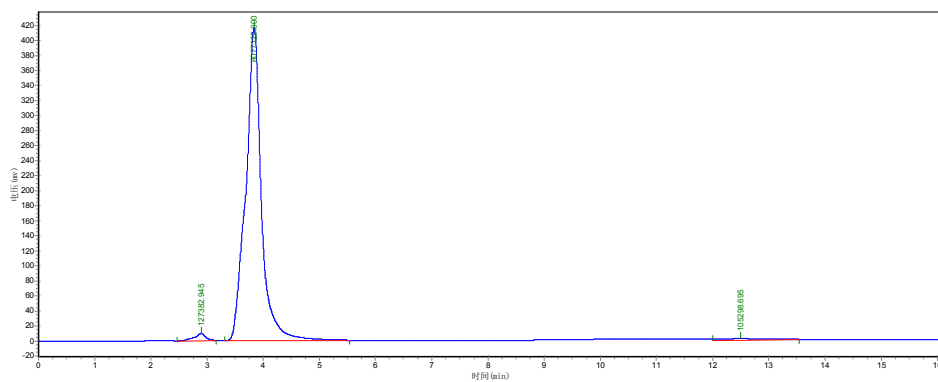

| No. | Retention time | Peak height | Peak area   | Percent |
|-----|----------------|-------------|-------------|---------|
| 1   | 2.895          | 9543.234    | 127382.945  | 1.5329  |
| 2   | 3.838          | 416943.406  | 8077125.000 | 97.1999 |
| 3   | 12.500         | 1980.607    | 105298.695  | 1.2672  |

total 100

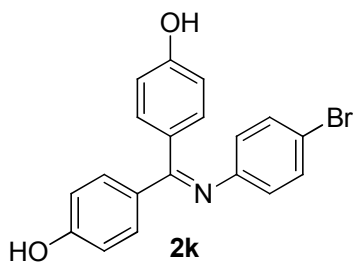

Normal Phase (Method 40:60 Hexane: EtOAc, Flow rate 0.7mL/min)

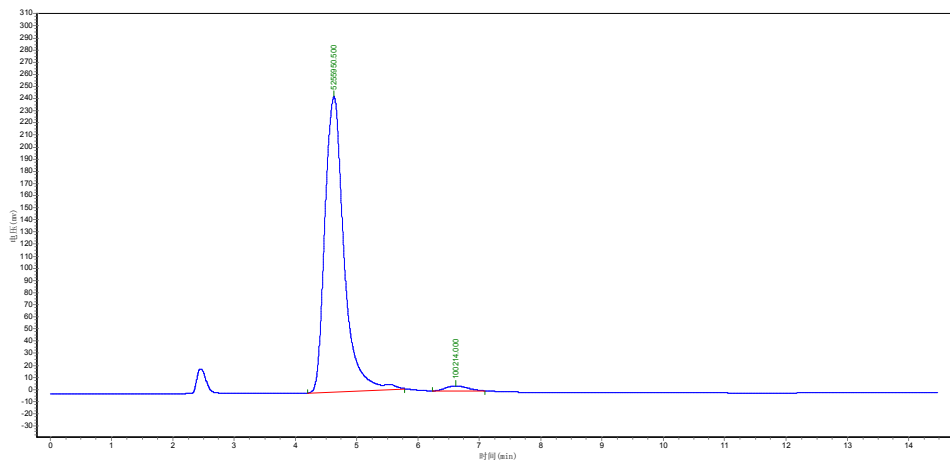

| No. | Retention time | Peak height | Peak area   | Percent |
|-----|----------------|-------------|-------------|---------|
| 1   | 4.628          | 243823.969  | 5255950.500 | 98.1290 |
| 2   | 6.612          | 4162.609    | 100214.000  | 1.8710  |

total 100

Reverse Phase (Method 40:60 H<sub>2</sub>O:CH<sub>3</sub>CN, Flow rate 0.7mL/min)

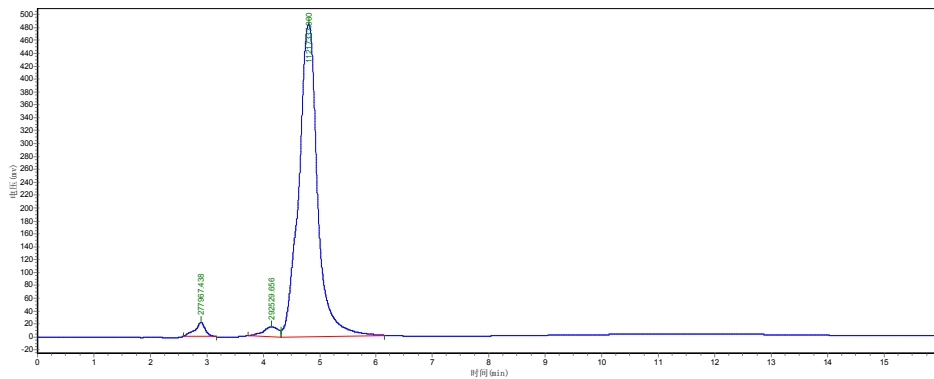

| No. | Retention time | Peak height | Peak area    | Percent |
|-----|----------------|-------------|--------------|---------|
| 1   | 2.895          | 22001.090   | 277967.438   | 2.3581  |
| 2   | 4.150          | 15585.571   | 292529.656   | 2.4816  |
| 3   | 4.805          | 484846.188  | 11217337.000 | 95.1603 |

total 100

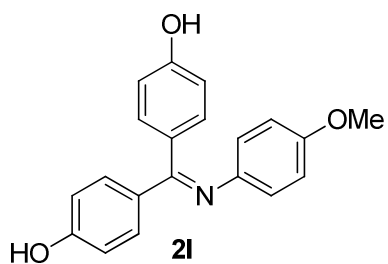

Normal Phase (Method 40:60 Hexane: EtOAc, Flow rate 0.7mL/min)

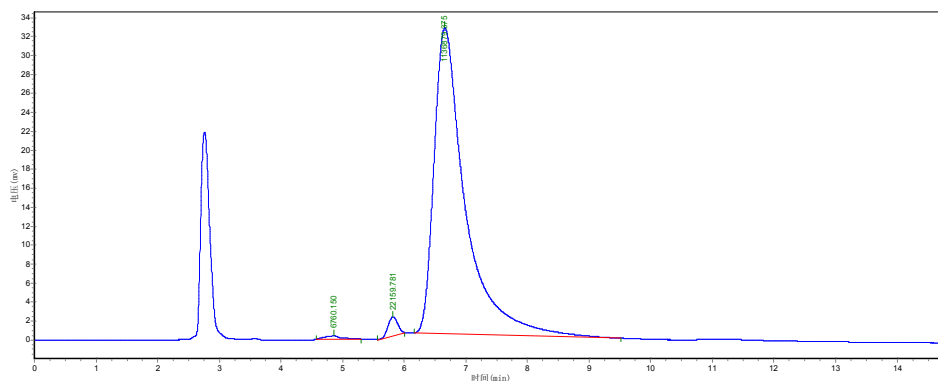

| No. | Retention time | Peak height | Peak area   | Percent |
|-----|----------------|-------------|-------------|---------|
| 1   | 4.857          | 342.995     | 6760.150    | 0.5799  |
| 2   | 5.818          | 2001.558    | 22159.781   | 1.9008  |
| 3   | 6.660          | 32248.516   | 1136879.375 | 97.5193 |

total 100

Reverse Phase (Method 40:60 H<sub>2</sub>O:CH<sub>3</sub>CN, Flow rate 0.7mL/min)

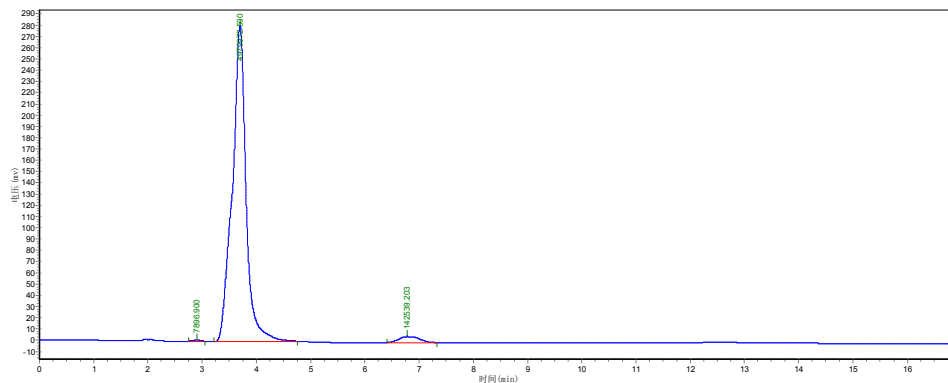

| No. | Retention time | Peak height | Peak area   | Percent |
|-----|----------------|-------------|-------------|---------|
| 1   | 2.902          | 923.000     | 7896.900    | 0.1539  |
| 2   | 3.697          | 280619.688  | 4979972.500 | 97.0678 |
| 3   | 6.777          | 5369.090    | 142539.203  | 2.7783  |

total 100



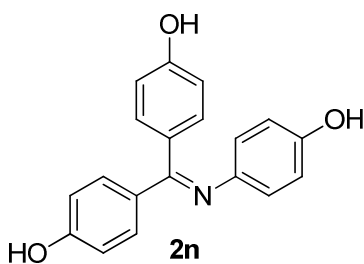

Normal Phase (Method 40:60 Hexane: EtOAc, Flow rate 0.7mL/min)

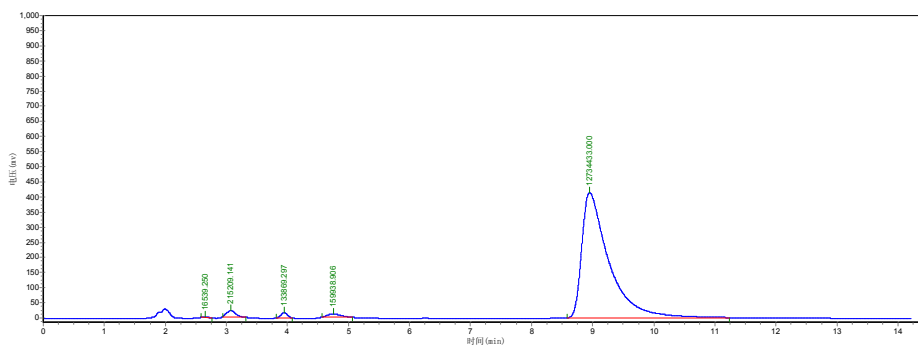

| No. | Retention time | Peak height | Peak area    | Percent |
|-----|----------------|-------------|--------------|---------|
| 1   | 2.650          | 2686.515    | 16539.250    | 0.1247  |
| 2   | 3.075          | 20911.350   | 215209.141   | 1.6230  |
| 3   | 3.947          | 17989.904   | 133869.297   | 1.0096  |
| 4   | 4.752          | 10440.277   | 159938.906   | 1.2062  |
| 5   | 8.950          | 414700.594  | 12734433.000 | 96.0365 |

total 100

Reverse Phase (Method 40:60 H<sub>2</sub>O:CH<sub>3</sub>CN, Flow rate 0.7mL/min)

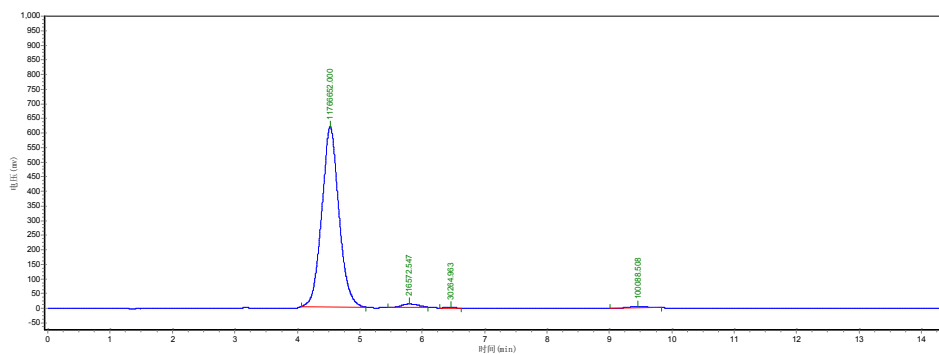

| No. | Retention time | Peak height | Peak area    | Percent |
|-----|----------------|-------------|--------------|---------|
| 1   | 4.525          | 616574.813  | 11766652.000 | 97.1360 |
| 2   | 5.797          | 11557.197   | 216572.547   | 1.7878  |
| 3   | 6.455          | 1721.950    | 30264.963    | 0.2498  |
| 4   | 9.457          | 4640.454    | 100088.508   | 0.8263  |

total 100

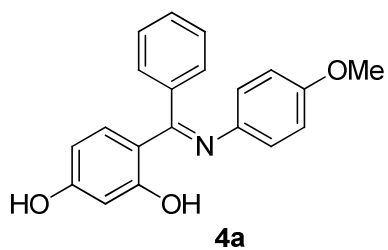

Normal Phase (Method 40:60 Hexane: EtOAc, Flow rate 0.7mL/min)

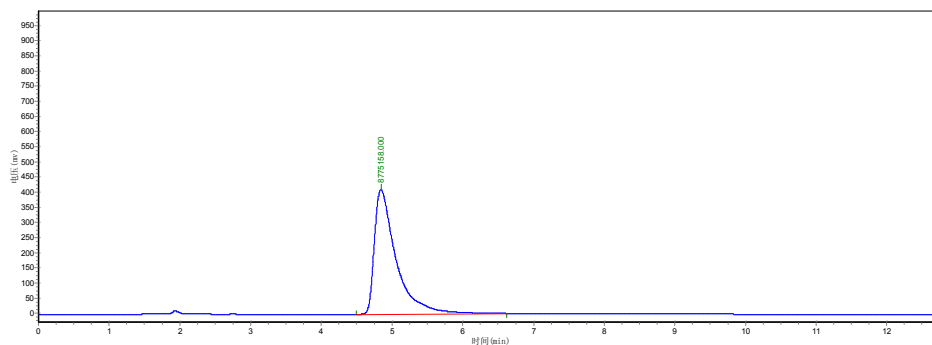

| No. | Retention time | Peak height | Peak area   | Percent  |
|-----|----------------|-------------|-------------|----------|
| 1   | 4.842          | 411060.375  | 8775158.000 | 100.0000 |

total 100

Reverse Phase (Method 40:60 H<sub>2</sub>O:CH<sub>3</sub>CN, Flow rate 0.7mL/min)

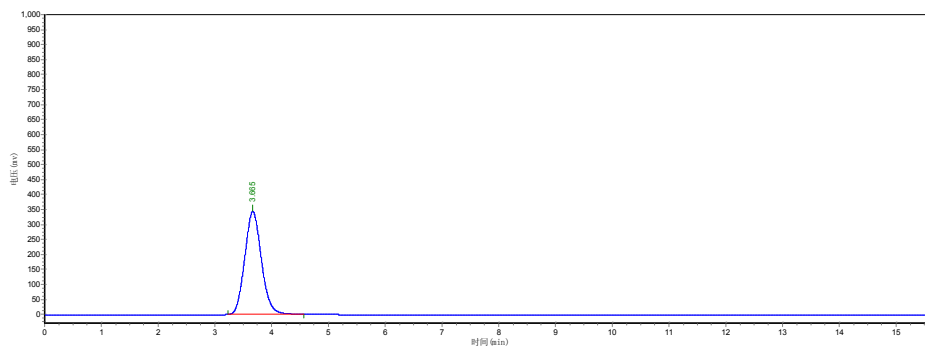

| No. | Retention time | Peak height | Peak area   | Percent  |
|-----|----------------|-------------|-------------|----------|
| 1   | 3.665          | 343985.469  | 7007134.500 | 100.0000 |

total 100

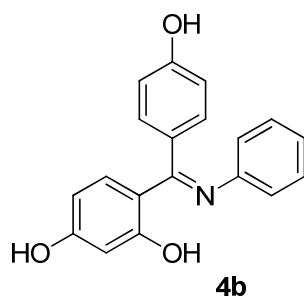

Normal Phase (Method 40:60 Hexane: EtOAc, Flow rate 0.7mL/min)

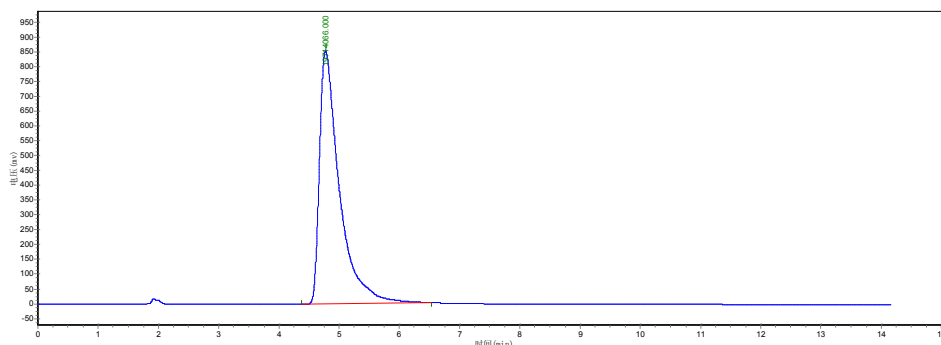

| No. | Retention time | Peak height | Peak area    | Percent  |
|-----|----------------|-------------|--------------|----------|
| 1   | 4.873          | 856403.875  | 19714066.000 | 100.0000 |

total 100

Reverse Phase (Method 40:60 H<sub>2</sub>O:CH<sub>3</sub>CN, Flow rate 0.7mL/min)

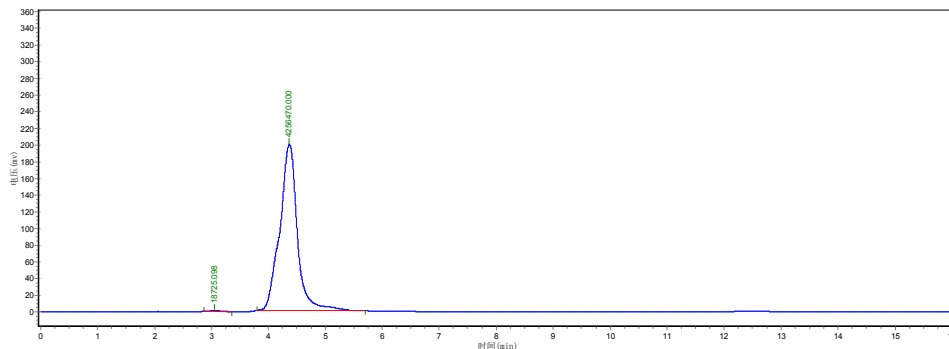

| No. | Retention time | Peak height | Peak area   | Percent |
|-----|----------------|-------------|-------------|---------|
| 1   | 3.058          | 1608.083    | 18725.098   | 0.4380  |
| 2   | 4.368          | 198907.078  | 4256470.000 | 99.5620 |

total 100

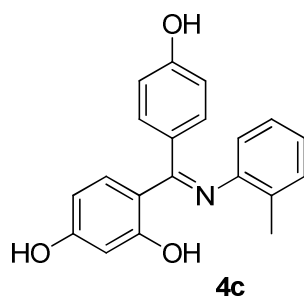

Normal Phase (Method 40:60 Hexane: EtOAc, Flow rate 0.7mL/min)

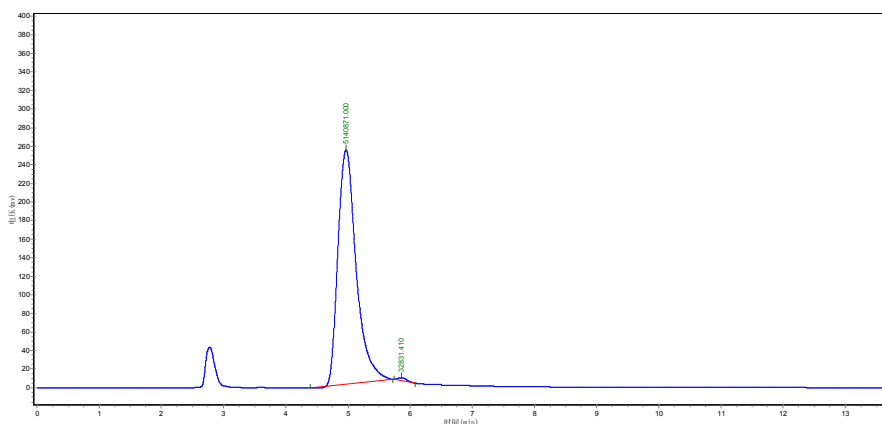

| No. | Retention time | Peak height | Peak area   | Percent |
|-----|----------------|-------------|-------------|---------|
| 1   | 4.972          | 252006.688  | 5140871.000 | 99.3654 |
| 2   | 5.858          | 3324.104    | 32831.410   | 0.6346  |

total 100

Reverse Phase (Method 40:60 H<sub>2</sub>O:CH<sub>3</sub>CN, Flow rate 0.7mL/min)

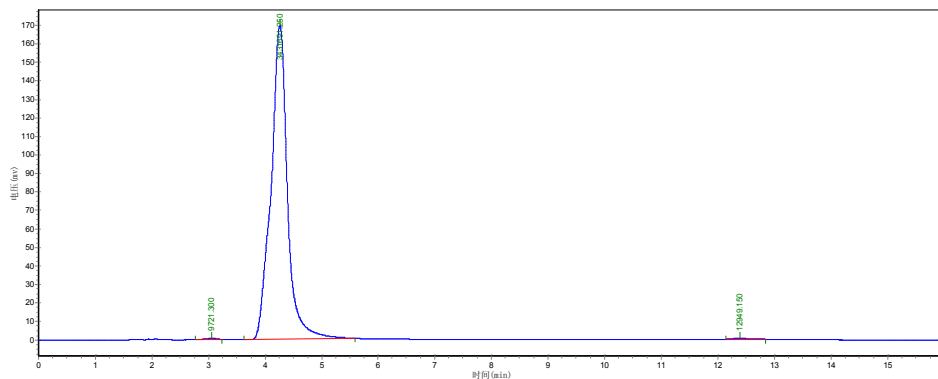

| No. | Retention time | Peak height | Peak area   | Percent |
|-----|----------------|-------------|-------------|---------|
| 1   | 3.158          | 787.440     | 9721.300    | 0.2814  |
| 2   | 4.262          | 169487.391  | 3431691.250 | 99.3437 |
| 3   | 12.385         | 552.400     | 12949.150   | 0.3749  |

total 100

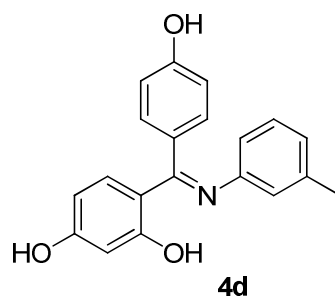

Normal Phase (Method 40:60 Hexane: EtOAc, Flow rate 0.7mL/min)

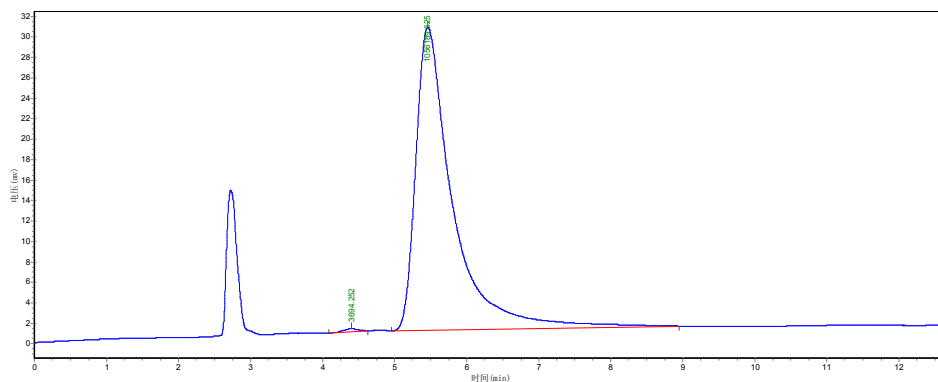

| No. | Retention time | Peak height | Peak area   | Percent |
|-----|----------------|-------------|-------------|---------|
| 1   | 4.402          | 270.967     | 3694.252    | 0.3486  |
| 2   | 5.460          | 29625.785   | 1056189.625 | 99.6515 |

total 100

Reverse Phase (Method 40:60 H<sub>2</sub>O:CH<sub>3</sub>CN, Flow rate 0.7mL/min)

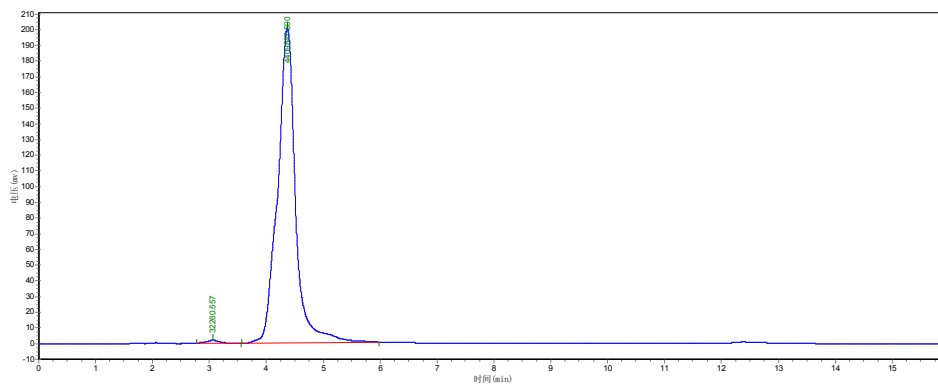

| No. | Retention time | Peak height | Peak area   | Percent |
|-----|----------------|-------------|-------------|---------|
| 1   | 3.058          | 1997.052    | 32260.557   | 0.7262  |
| 2   | 4.368          | 200327.063  | 4409847.500 | 99.2738 |

total 100

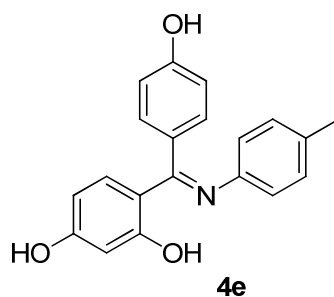

Normal Phase (Method 40:60 Hexane: EtOAc, Flow rate 0.7mL/min)

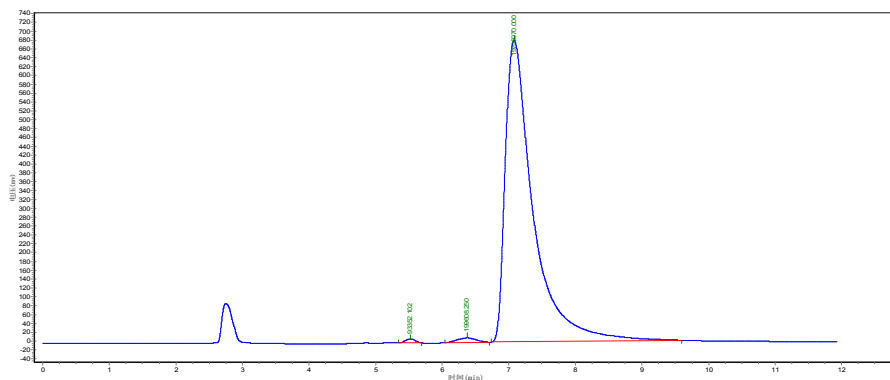

| No. | Retention time | Peak height | Peak area    | Percent |
|-----|----------------|-------------|--------------|---------|
| 1   | 5.520          | 8812.868    | 93352.102    | 0.4647  |
| 2   | 6.375          | 10372.841   | 199608.250   | 0.9937  |
| 3   | 7.080          | 681073.938  | 19795070.000 | 98.5416 |

total 100

Reverse Phase (Method 40:60 H<sub>2</sub>O:CH<sub>3</sub>CN, Flow rate 0.7mL/min)

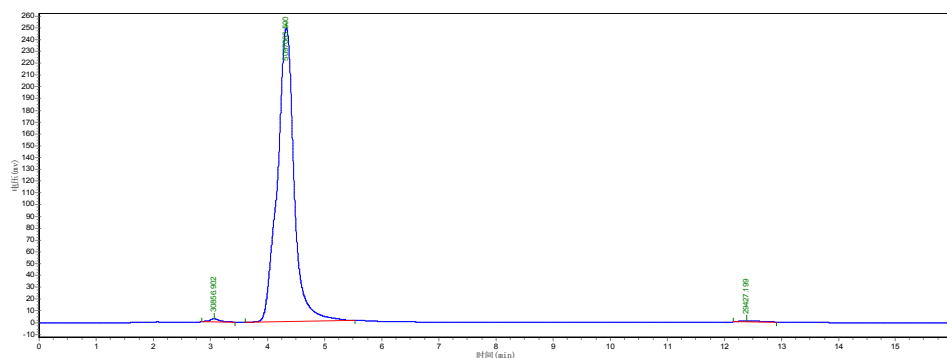

| No. | Retention time | Peak height | Peak area   | Percent |
|-----|----------------|-------------|-------------|---------|
| 1   | 3.065          | 2476.125    | 30856.902   | 0.5983  |
| 2   | 4.332          | 248876.813  | 5097063.500 | 98.8311 |
| 3   | 12.400         | 1099.558    | 29427.199   | 0.5706  |

total 100

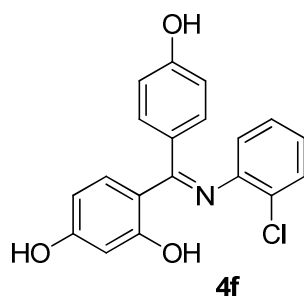

Normal Phase (Method 40:60 Hexane: EtOAc, Flow rate 0.7mL/min)

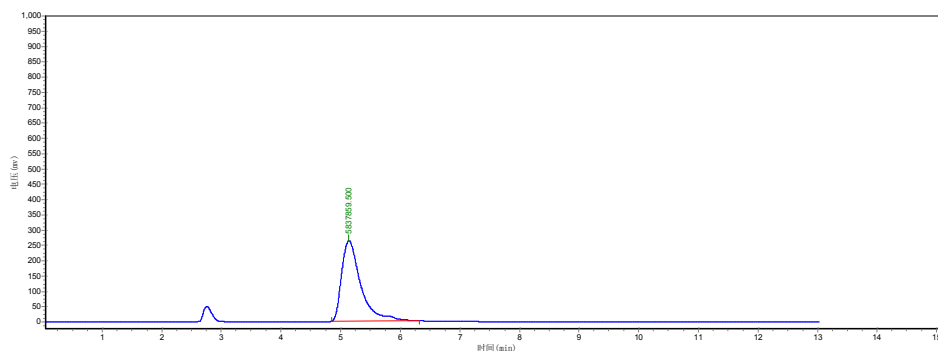

| No. | Retention time | Peak height | Peak area   | Percent  |
|-----|----------------|-------------|-------------|----------|
| 1   | 5.140          | 264948.375  | 6034239.500 | 100.0000 |

total 100

Reverse Phase (Method 40:60 H<sub>2</sub>O:CH<sub>3</sub>CN, Flow rate 0.7mL/min)

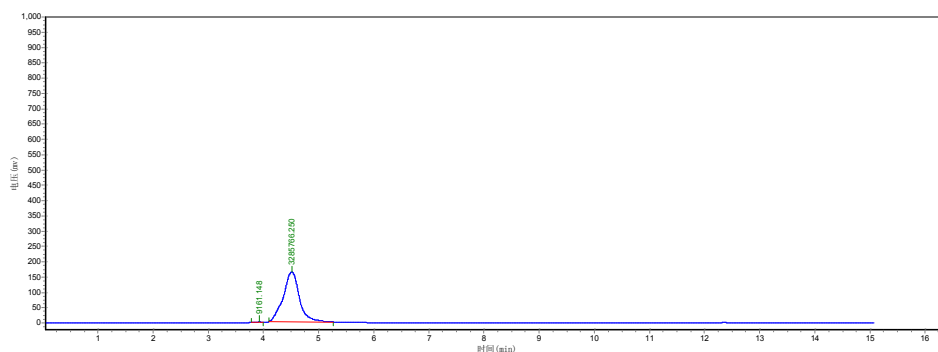

| No. | Retention time | Peak height | Peak area   | Percent |
|-----|----------------|-------------|-------------|---------|
| 1   | 3.927          | 1157.953    | 9161.148    | 0.2780  |
| 2   | 4.515          | 161597.359  | 3285766.250 | 99.7220 |

total 100

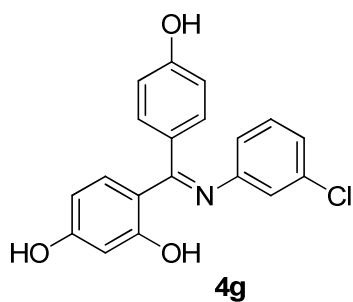

Normal Phase (Method 40:60 Hexane: EtOAc, Flow rate 0.7mL/min)

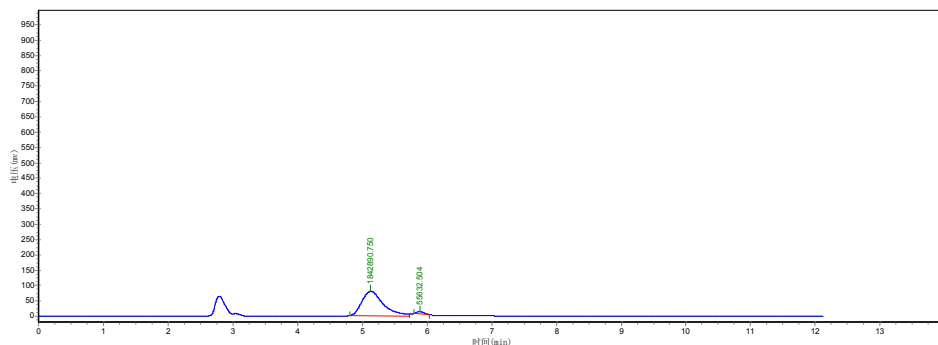

| No. | Retention time | Peak height | Peak area   | Percent |
|-----|----------------|-------------|-------------|---------|
| 1   | 5.132          | 79443.859   | 1842890.750 | 97.0697 |
| 2   | 5.890          | 6801.754    | 55632.504   | 2.9303  |

total 100

Reverse Phase (Method 40:60 H<sub>2</sub>O:CH<sub>3</sub>CN, Flow rate 0.7mL/min)

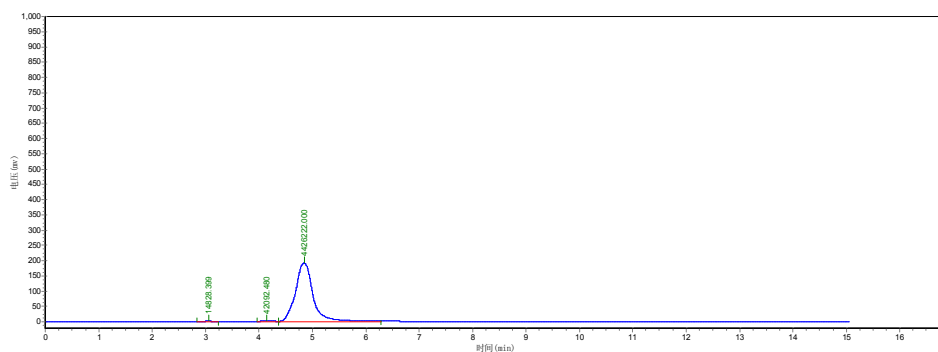

| No. | Retention time | Peak height | Peak area   | Percent |
|-----|----------------|-------------|-------------|---------|
| 1   | 3.053          | 1324.133    | 14828.399   | 0.3308  |
| 2   | 4.148          | 2837.359    | 42092.480   | 0.9389  |
| 3   | 4.843          | 191665.156  | 4426222.000 | 98.7303 |

total 100



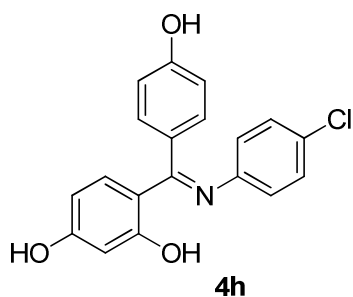

Normal Phase (Method 40:60 Hexane: EtOAc, Flow rate 0.7mL/min)

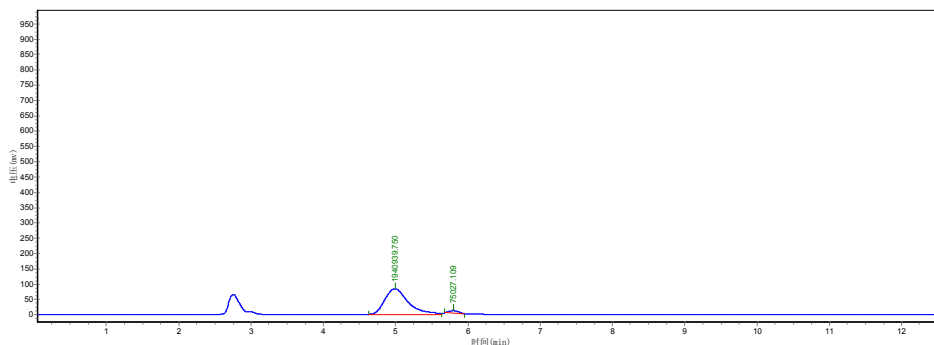

| No. | Retention time | Peak height | Peak area   | Percent |
|-----|----------------|-------------|-------------|---------|
| 1   | 4.992          | 84615.273   | 1940939.750 | 96.2784 |
| 2   | 5.795          | 8269.368    | 75027.109   | 3.7216  |

total 100

Reverse Phase (Method 40:60 H<sub>2</sub>O:CH<sub>3</sub>CN, Flow rate 0.7mL/min)

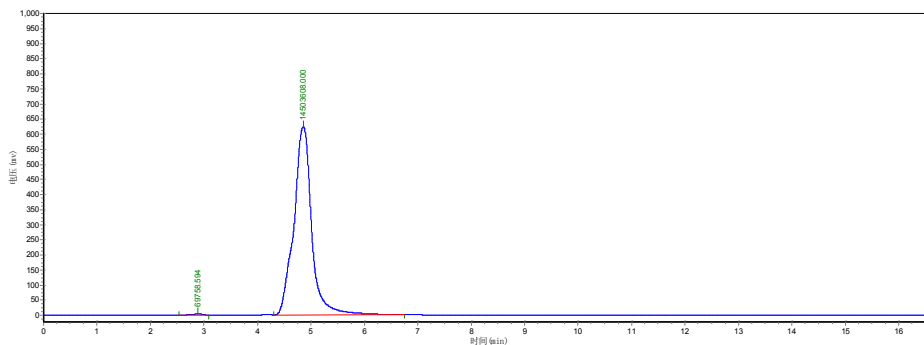

| No. | Retention time | Peak height | Peak area    | Percent |
|-----|----------------|-------------|--------------|---------|
| 1   | 2.893          | 5449.716    | 69758.594    | 0.4787  |
| 2   | 4.863          | 624828.188  | 14503608.000 | 99.5213 |

total 100

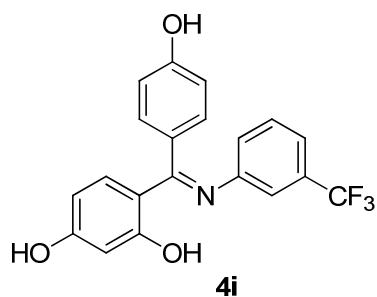

Normal Phase (Method 40:60 Hexane: EtOAc, Flow rate 0.7mL/min)

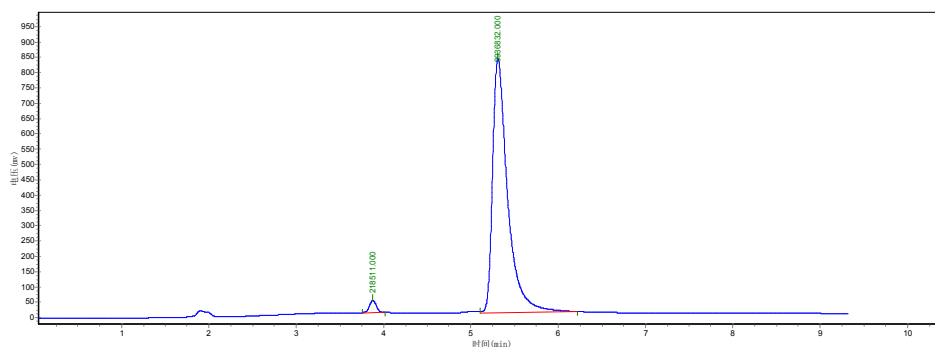

| No. | Retention time | Peak height | Peak area   | Percent |
|-----|----------------|-------------|-------------|---------|
| 1   | 3.877          | 39731.176   | 218511.000  | 2.1517  |
| 2   | 5.310          | 829883.063  | 9936832.000 | 97.8483 |

total 100

Reverse Phase (Method 40:60 H<sub>2</sub>O:CH<sub>3</sub>CN, Flow rate 0.7mL/min)

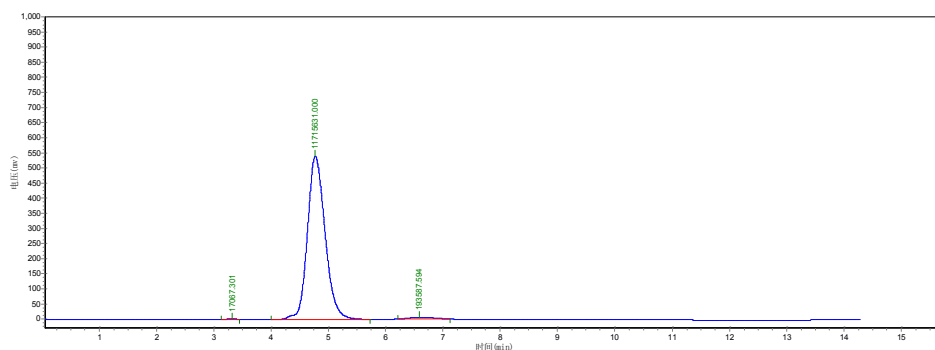

| No. | Retention time | Peak height | Peak area    | Percent |
|-----|----------------|-------------|--------------|---------|
| 1   | 3.312          | 1500.217    | 17067.301    | 0.1431  |
| 2   | 4.768          | 541923.813  | 11715631.000 | 98.2337 |
| 3   | 6.588          | 6366.037    | 193587.594   | 1.6232  |

total 100

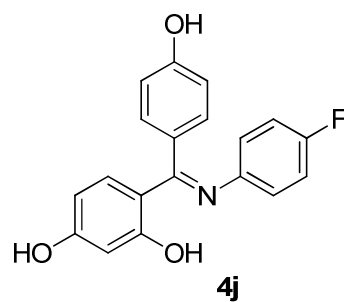

Normal Phase (Method 40:60 Hexane: EtOAc, Flow rate 0.7mL/min)

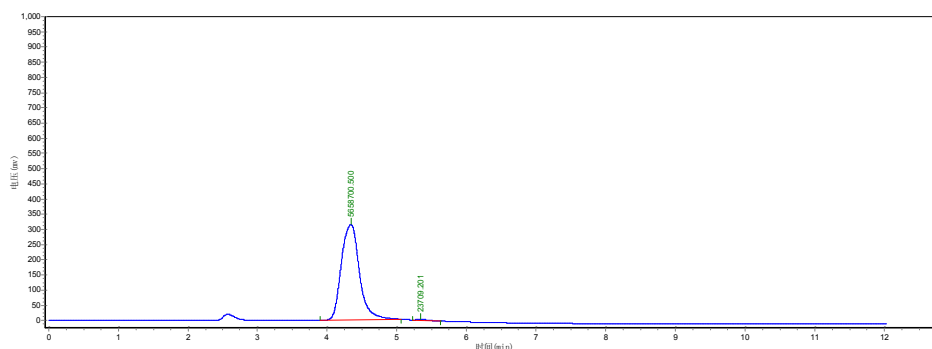

| No. | Retention time | Peak height | Peak area   | Percent |
|-----|----------------|-------------|-------------|---------|
| 1   | 4.462          | 313899.969  | 5658700.500 | 99.5828 |
| 2   | 5.348          | 2015.966    | 23709.201   | 0.4172  |

total 100

Reverse Phase (Method 40:60 H<sub>2</sub>O:CH<sub>3</sub>CN, Flow rate 0.7mL/min)

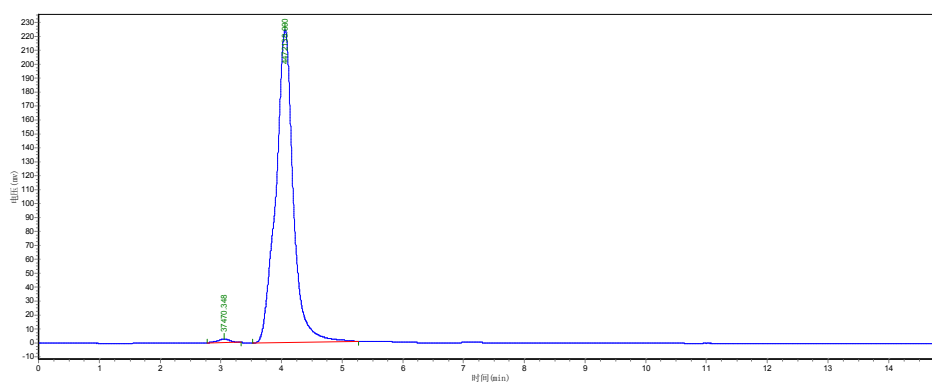

| No. | Retention time | Peak height | Peak area   | Percent |
|-----|----------------|-------------|-------------|---------|
| 1   | 3.055          | 2660.687    | 37470.348   | 0.8309  |
| 2   | 4.062          | 224164.500  | 4472138.000 | 99.1691 |

total 100

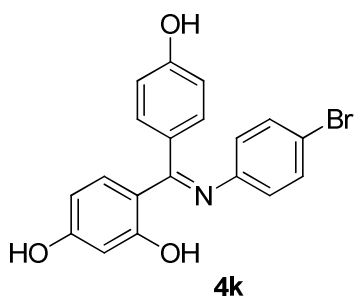

Normal Phase (Method 40:60 Hexane: EtOAc, Flow rate 0.7mL/min)

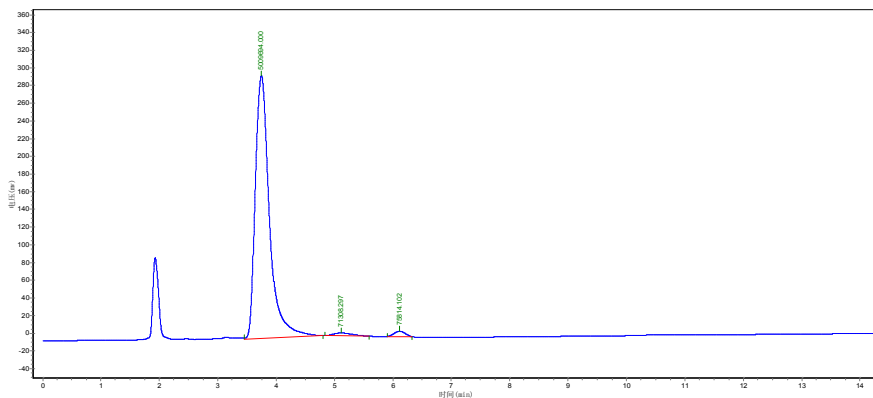

| No. | Retention time | Peak height | Peak area   | Percent |
|-----|----------------|-------------|-------------|---------|
| 1   | 3.748          | 296705.031  | 5009694.000 | 97.1470 |
| 2   | 5.108          | 3173.552    | 71308.297   | 1.3828  |
| 3   | 6.117          | 5808.320    | 75814.102   | 1.4702  |

total 100

Reverse Phase (Method 40:60 H<sub>2</sub>O:CH<sub>3</sub>CN, Flow rate 0.7mL/min)

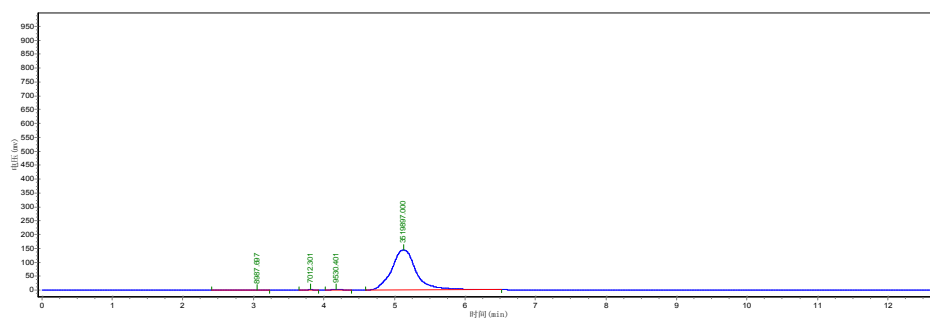

| No. | Retention time | Peak height | Peak area   | Percent |
|-----|----------------|-------------|-------------|---------|
| 1   | 3.057          | 948.539     | 8987.697    | 0.2535  |
| 2   | 3.815          | 708.000     | 7012.301    | 0.1978  |
| 3   | 4.177          | 725.735     | 9530.401    | 0.2688  |
| 4   | 5.127          | 143966.922  | 3519897.000 | 99.2799 |

total 100

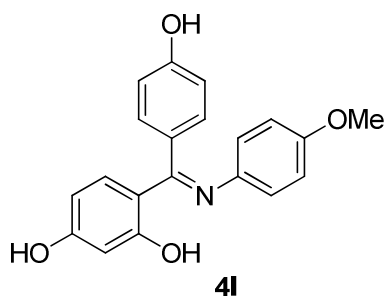

Normal Phase (Method 40:60 Hexane: EtOAc, Flow rate 0.7mL/min)

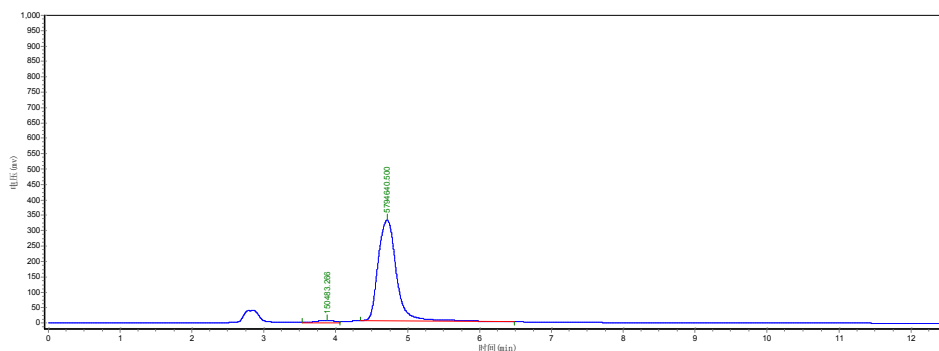

| No. | Retention time | Peak height | Peak area   | Percent |
|-----|----------------|-------------|-------------|---------|
| 1   | 3.880          | 7601.659    | 150483.266  | 2.5312  |
| 2   | 4.717          | 326855.313  | 5794640.500 | 97.4688 |

total 100

Reverse Phase (Method 40:60 H<sub>2</sub>O:CH<sub>3</sub>CN, Flow rate 0.7mL/min)

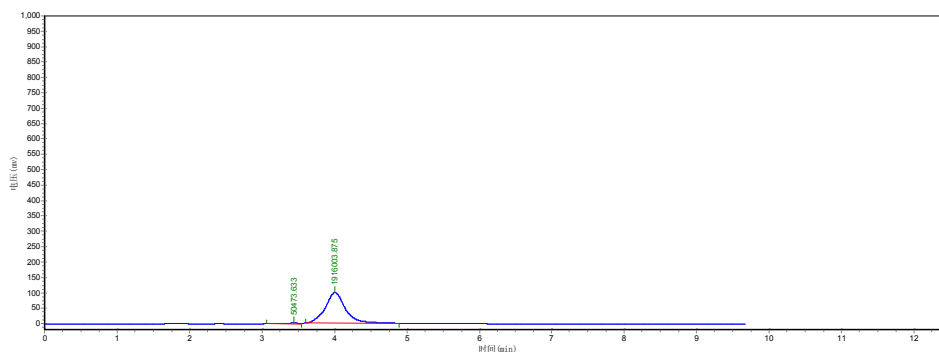

| No. | Retention time | Peak height | Peak area   | Percent |
|-----|----------------|-------------|-------------|---------|
| 1   | 3.437          | 2761.152    | 50473.633   | 2.5667  |
| 2   | 4.007          | 98980.539   | 1916003.875 | 97.4333 |

total 100

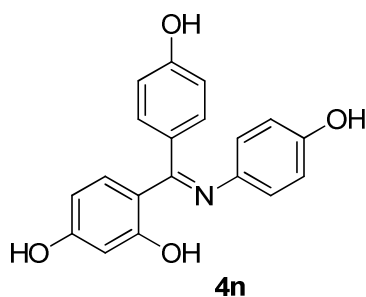

Normal Phase (Method 40:60 Hexane: EtOAc, Flow rate 0.7mL/min)

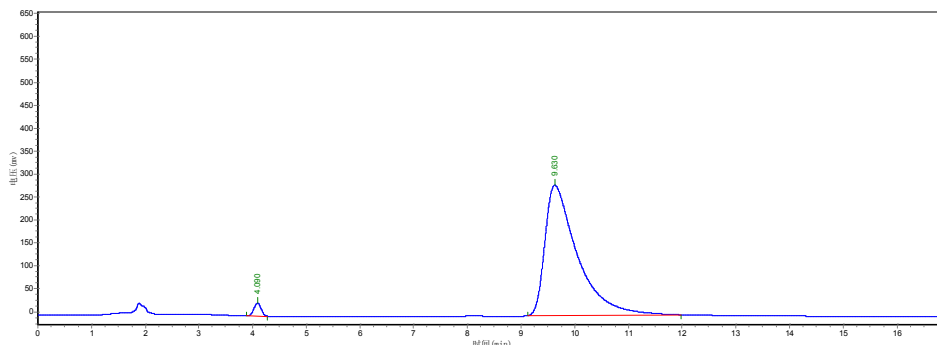

| No. | Retention time | Peak height | Peak area    | Percent |
|-----|----------------|-------------|--------------|---------|
| 1   | 4.090          | 27935.652   | 265599.375   | 2.1777  |
| 2   | 9.630          | 284386.000  | 11930706.000 | 97.8223 |

total 100

Reverse Phase (Method 40:60 H<sub>2</sub>O:CH<sub>3</sub>CN, Flow rate 0.7mL/min)

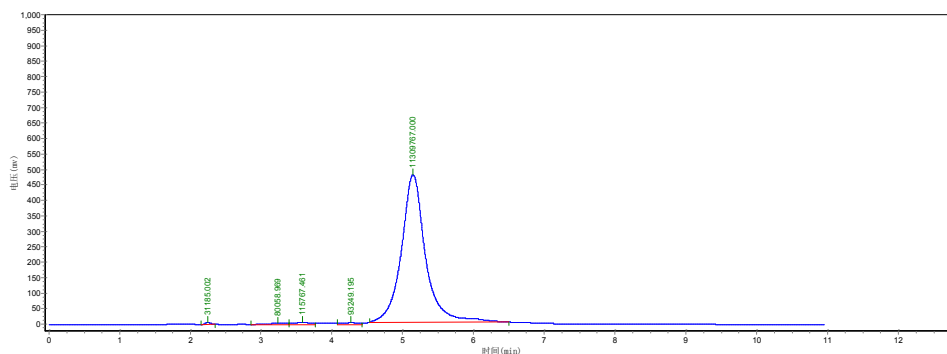

| No. | Retention time | Peak height | Peak area    | Percent |
|-----|----------------|-------------|--------------|---------|
| 1   | 2.245          | 6293.490    | 31185.002    | 0.2681  |
| 2   | 3.238          | 4626.422    | 80058.969    | 0.6884  |
| 3   | 3.582          | 6729.552    | 115767.461   | 0.9954  |
| 4   | 4.272          | 5669.687    | 93249.195    | 0.8018  |
| 5   | 5.147          | 476242.719  | 11309767.000 | 97.2463 |

total 100
